# Supplementary material for: Carbon Nanofiber-Ionic Liquid Nanocomposite Modified Aptasensors Developed for Electrochemical Investigation of Interaction of Aptamer/Aptamer–Antisense Pair with Activated Protein C
Source: MDPI journal article supplement (doi:10.3390/bios13040458), 2023-04-04
Supplement: s1 [file s1]

## Supplementary Material

**Carbon nanofiber-ionic liquid nanocomposite modified aptasensors developed for electrochemical investigation of interaction of aptamer / aptamer-antisense pair with activated protein C**

**Meltem Maral <sup>1,2</sup> and Arzum Erdem <sup>1,2</sup> \***

<sup>1</sup> Department of Material Science and Engineering, The Institute of Natural and Applied Sciences, Ege University, Bornova, 35100, Izmir, TURKEY

<sup>2</sup> Analytical Chemistry Department, Faculty of Pharmacy, Ege University, Bornova, 35100, Izmir, TURKEY

\* Corresponding author (A. Erdem) [arzum.erdem@ege.edu.tr](mailto:arzum.erdem@ege.edu.tr) and [arzume@hotmail.com](mailto:arzume@hotmail.com)

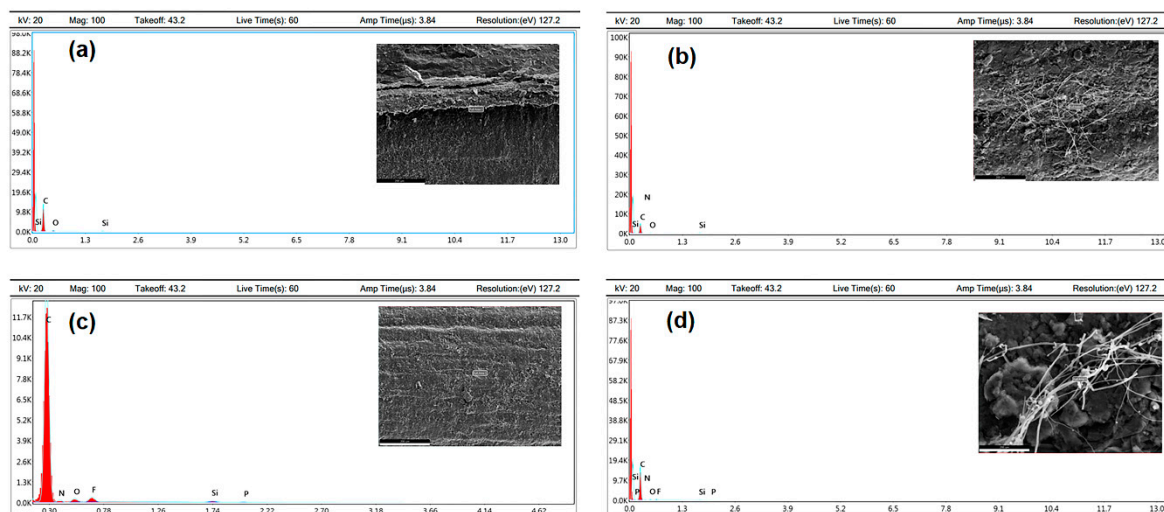

**Figure S1.** The EDX spectrum on the surface (A) PGE (control), (B) CNF-PGE, (C) IL-PGE, (D) CNF-IL/PGE.

| (a)     |          |          |         | (b)     |          |          |         |
|---------|----------|----------|---------|---------|----------|----------|---------|
| Element | Weight % | Atomic % | Error % | Element | Weight % | Atomic % | Error % |
| C K     | 87.74    | 90.72    | 3.12    | C K     | 85.51    | 88.74    | 3.83    |
| O K     | 11.54    | 8.96     | 12.19   | N K     | 4.31     | 3.83     | 28.15   |
| Si K    | 0.71     | 0.32     | 6.33    | O K     | 8.68     | 6.76     | 14.57   |
|         |          |          |         | Si K    | 1.5      | 0.67     | 5.92    |
| (c)     |          |          |         | (d)     |          |          |         |
| Element | Weight % | Atomic % | Error % | Element | Weight % | Atomic % | Error % |
| C K     | 83.65    | 86.93    | 3.04    | C K     | 84.56    | 87.65    | 2.92    |
| N K     | 7.63     | 6.8      | 19.76   | N K     | 7.23     | 6.42     | 21.74   |
| O K     | 5.09     | 3.97     | 14.37   | O K     | 5.01     | 3.9      | 14.53   |
| F K     | 3.27     | 2.15     | 12.42   | F K     | 2.89     | 1.89     | 12.54   |
| Si K    | 0.25     | 0.11     | 11.5    | Si K    | 0.24     | 0.1      | 11.64   |
| P K     | 0.12     | 0.05     | 23.29   | P K     | 0.08     | 0.03     | 30.35   |

**Figure S2.** The element concentrations for carbon (C), fluorine (F), nitrogen (N), oxygen (O), phosphorus (P), silicon (Si), atoms n the surface of (A) PGE (control), (B) CNF/PGE, (C) IL/PGE, (D) CNF-IL/PGE.

Since the composite modified electrodes prepared with 5 % ionic liquid have the highest current value, the highest surface area, and the best reproducibility, it was decided to be the optimum ionic liquid percentage (Table S1).

**Table S1.** The RSD % value and  $I_a$  increase values in the mean anodic current measured in voltammetric examination of the effect of % IL change on the response with CV technique (n=3).

| Electrodes       | $I_a$ ( $\mu A$ )  | RSD % | % increase in value of $I_a$ |
|------------------|--------------------|-------|------------------------------|
| PGE (control)    | $71.77 \pm 17.08$  | 23.81 | -                            |
| CNF – 2 % IL/PGE | $96.90 \pm 17.57$  | 18.13 | 35.01                        |
| CNF – 3 % IL/PGE | $120.28 \pm 13.76$ | 11.44 | 67.6                         |
| CNF – 5 % IL/PGE | $128.46 \pm 3.39$  | 2.64  | 79                           |
| CNF – 7 % IL/PGE | $123.09 \pm 4.33$  | 3.52  | 71.5                         |

**Table S2.** The average values (n=3) of the anodic peak current (Ia), the cathodic current (Ic), anodic charge value (Qa), the cathodic charge value (Qc) and the calculated surface area (A) obtained by unmodified PGE, PGE (control), CNF/PGE, IL/PGE, CNF-IL/PGE.

| Electrodes    | Ia ( $\mu\text{A}$ ) | Qa (mC)         | A ( $\text{cm}^2$ ) | Ic ( $\mu\text{A}$ ) | Qc (mC)         | A ( $\text{cm}^2$ ) |
|---------------|----------------------|-----------------|---------------------|----------------------|-----------------|---------------------|
| PGE           | 62.66 $\pm$ 20.89    | 1.30 $\pm$ 0.26 | 0.189               | 80.06 $\pm$ 20.57    | 0.97 $\pm$ 0.23 | 0.242               |
| PGE (control) | 71.77 $\pm$ 17.09    | 1.41 $\pm$ 0.13 | 0.217               | 84.91 $\pm$ 16.62    | 1.07 $\pm$ 0.10 | 0.256               |
| CNF/PGE       | 81.94 $\pm$ 16.04    | 1.48 $\pm$ 0.16 | 0.247               | 94.43 $\pm$ 15.47    | 1.12 $\pm$ 0.12 | 0.285               |
| IL/PGE        | 125.58 $\pm$ 6.14    | 1.68 $\pm$ 0.13 | 0.379               | 114.71 $\pm$ 65.89   | 1.28 $\pm$ 0.08 | 0.346               |
| CNF-IL/PGE    | 128.47 $\pm$ 3.39    | 1.74 $\pm$ 0.05 | 0.388               | 116.975 $\pm$ 26.27  | 1.35 $\pm$ 0.04 | 0.353               |

**Table S3.** The average Rct values (n=3) obtained by PGE, PGE (control), CNF/PGE, IL/PGE, CNF-IL/PGE electrodes.

| Electrodes    | Average Rct value (Ohm) | % Change in Rct value | RSD % |
|---------------|-------------------------|-----------------------|-------|
| PGE           | 56.68 $\pm$ 19.76       | -                     | 34.86 |
| PGE (control) | 208.40 $\pm$ 33.53      | 267.71 increase       | 16.09 |
| CNF/PGE       | 159.00 $\pm$ 41.32      | 23.70 decrease        | 25.99 |
| IL/PGE        | 62.05 $\pm$ 19.80       | 70.23 decrease        | 31.91 |
| CNF-IL/PGE    | 53.22 $\pm$ 3.63        | 74.46 decrease        | 6.82  |

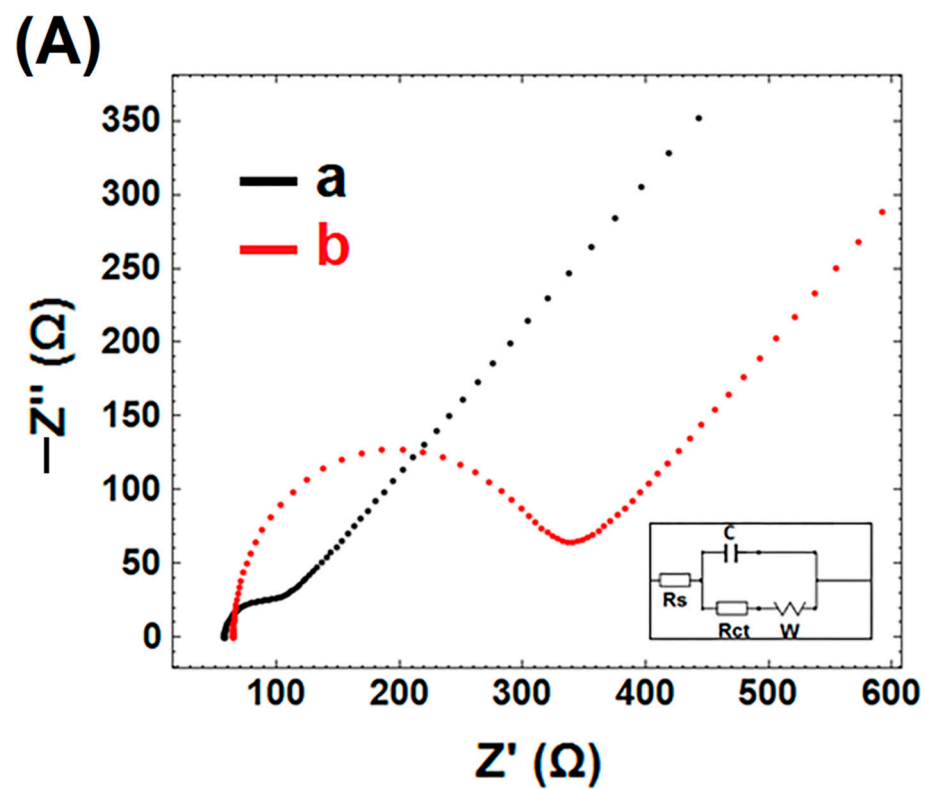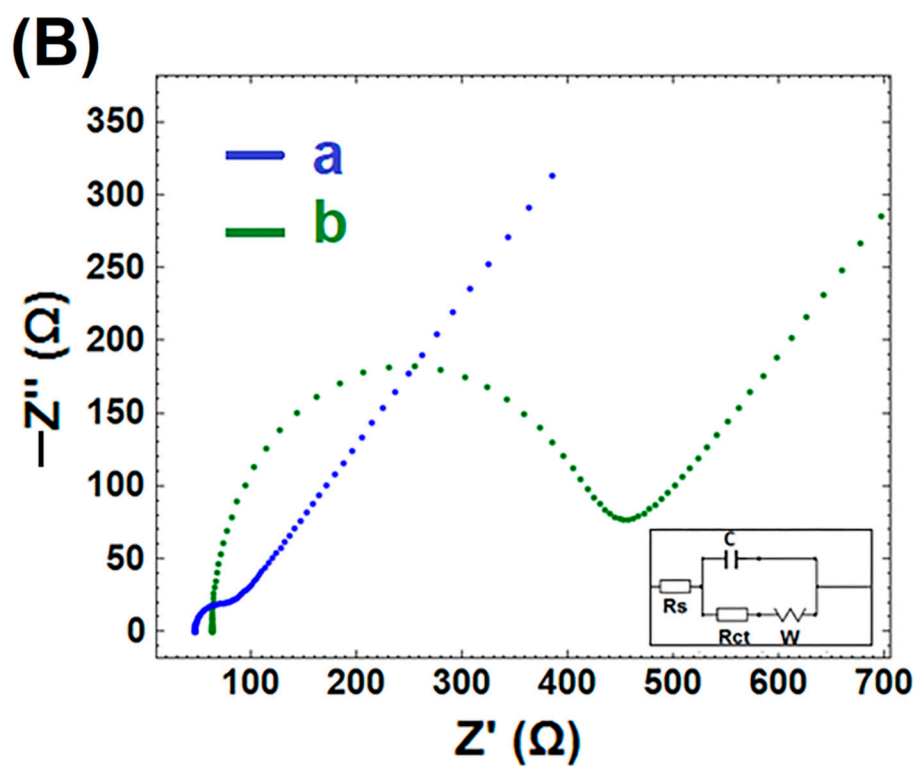

**Figure S3.** 0.2  $\mu\text{g/mL}$  DNA-Apt before and after immobilization (A) (a) PGE, (b) DNA-Apt/PGE, (B) (a) CNF-IL/PGE, (d) DNA-Apt /CNF-IL/PGE, Nyquist curves of measurements performed in redox solution containing 2.5 mM  $\text{Fe}(\text{CN})_6^{3-/4-}$ .

**Table S4.** Buffer effect after interaction of 0.05 µg/mL DNA-Apt and 0.2 µg/mL APC (n=3).

| Experimental group                        | Interaction experiment group with APC prepared in PBS medium | Interaction experiment group with APC prepared in TBS medium |
|-------------------------------------------|--------------------------------------------------------------|--------------------------------------------------------------|
|                                           | Average Rct value (Ohm)                                      |                                                              |
| DNA-Apt (control experiment)              | 233.6 ± 42.18                                                |                                                              |
| DNA-Apt : APC                             | 371 ± 4 1.01                                                 | 242.5 ± 62.93                                                |
| APC (control experiment)                  | 200.5 ± 85.56                                                | 209 ± 2 8.28                                                 |
| % change in Rct value relative to DNA-Apt | 58 % Increase                                                | 3 % Increase                                                 |

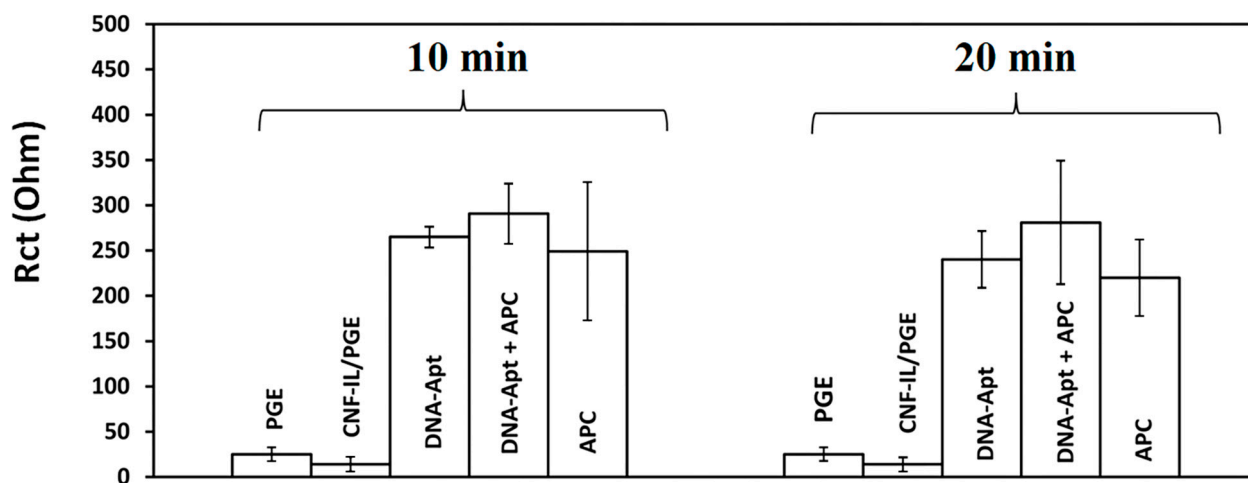

**Figure S4.** Niquist diagrams of the 10 and 20 min immobilization time study at 0.1 µg/mL DNA-Apt and 0.6 µg/mL APC concentration.

**Table S5.** Average Rct value (n=3) measured with DNA-Apt before/after interaction with APC in its increasing concentrations in buffer medium.

| Experimental group               | Average Rct value (Ohm) | RSD % | % change in Rct value relative to DNA-Apt |
|----------------------------------|-------------------------|-------|-------------------------------------------|
| 0.1 µg/mL DNA-Apt                | 227.00 ± 59.16          | 26,06 | 1.82 fold Increase*                       |
| 0.1 µg/mL Apt<br>+ 0.4 µg/mL APC | 263.25 ± 42.30          | 16.07 | 15.96 % Increase                          |
| 0.1 µg/mL Apt<br>+ 0.6 µg/mL APC | 281.40 ± 26.39          | 9.38  | 23.96 % Increase                          |
| 0.1 µg/mL Apt<br>+ 0.8 µg/mL APC | 313.40 ± 46.20          | 14.74 | 38. 06 % Increase                         |
| 0.1 µg/mL Apt<br>+ 1 µg/mL APC   | 352.50 ± 67.45          | 19.14 | 55.28 % Increase                          |
| 0.1 µg/mL Apt<br>+ 1.2 µg/mL APC | 389.80 ± 90.16          | 23.13 | 71. 71 % Increase                         |
| 0.1 µg/mL Apt<br>+ 1.4 µg/mL APC | 408.20 ± 60.96          | 14.94 | 79.82 % Increase                          |

\*1.82 fold increase was observed in the mean Rct value measured in the presence of DNA-Apt immobilization to the CNF-IL/PGE surface.

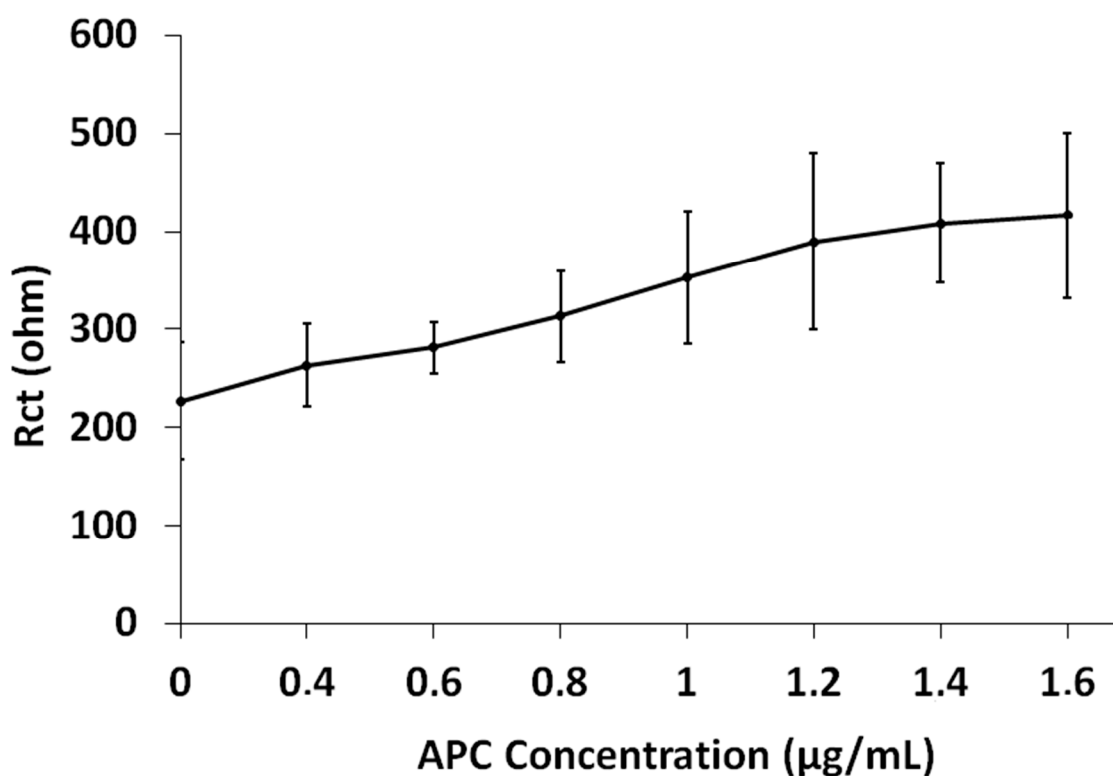

**Figure S5.** The average Rct value measured before and after 0.1 µg/mL DNA-Apt interaction with APC in various concentration ranging from 0 to 1.6 µg/mL at CNF-IL/PGE surface.

**Table S6** Average Rct value (n=3) measured with DNA-Apt before/after interaction with APC in its increasing concentrations in FBS medium.

| Experimental group               | Average Rct value (Ohm) | RSD % | % change in Rct value relative to DNA-Apt |
|----------------------------------|-------------------------|-------|-------------------------------------------|
| 0.1 µg/mL DNA-Apt                | 230.25 ± 14.01          | 6.08  | 7.13 fold Increase*                       |
| 0.1 µg/mL Apt<br>+ 0.2 µg/mL APC | 253.25 ± 18.41          | 7.27  | 9.98 % Increase                           |
| 0.1 µg/mL Apt<br>+ 0.4 µg/mL APC | 305.33 ± 55.82          | 18.28 | 32.60 % Increase                          |
| 0.1 µg/mL Apt<br>+ 0.6 µg/mL APC | 336.00 ± 46.99          | 13.98 | 41.75 % Increase                          |

\*7.13 fold increase was observed in the mean Rct value measured in the presence of DNA-Apt immobilization to the CNF-IL/PGE surface.

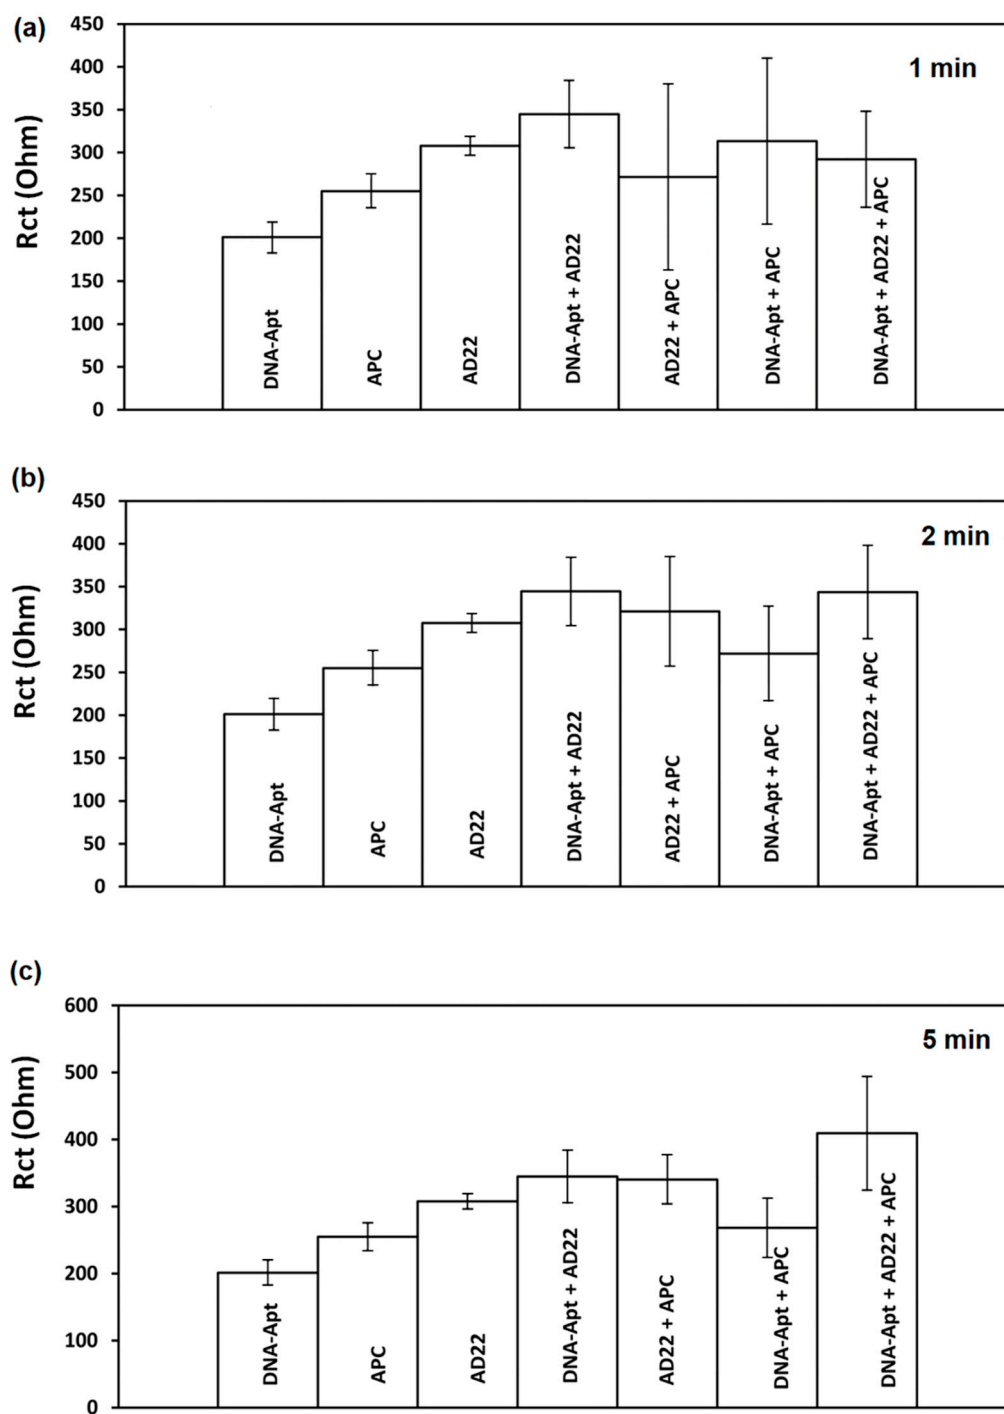

**Figure S6.** Histograms representing average Rct values (n=3) obtained in the absence and presence of the interaction of 0.1  $\mu\text{g/mL}$  DNA-Apt and 0.6  $\mu\text{g/mL}$  APC with 0.1  $\mu\text{g/mL}$  AD22 in its interaction time: a) 1 minute b) 2 minutes c) 5 minutes.



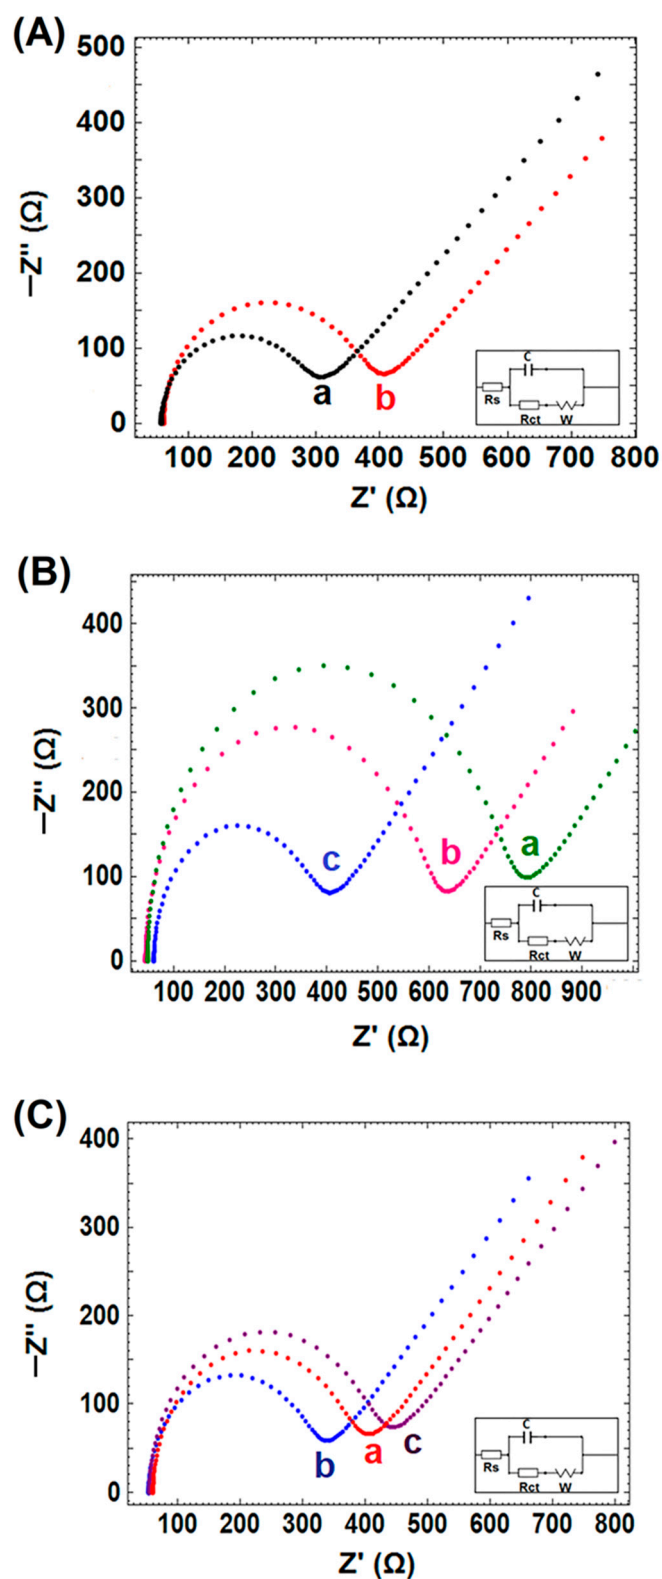

**Figure S7.** Nyquist diagrams obtained by CNF-IL modified PGE electrodes: (A) 0.1  $\mu\text{g/mL}$  DNA-Apt modified electrode prepared (a) in PBS, (b) in FBS; (B) In different dilution ratio (FBS : PBS) (a) 1 : 500, (b) 1 : 1000, (c) 1 : 2000 and (C) In the dilution ratio (1 : 2000) of FBS (a) 0.1  $\mu\text{g/mL}$  DNA-Apt, (b) 0.6  $\mu\text{g/mL}$  APC, (c) Interaction occurred between 0.1  $\mu\text{g/mL}$  DNA-Apt and 0.6  $\mu\text{g/mL}$  APC.

**Table S7.** The average Rct values (n=3) measured before and after interaction of 0.1 µg/mL DNA-Apt with 0.6 µg/mL APC in the presence of 0.1 µg/mL AD22.

| No | Experimental group                                                                   | Average Rct value (Ohm)        | RSD % | Change              |
|----|--------------------------------------------------------------------------------------|--------------------------------|-------|---------------------|
| 1  | DNA-Apt (control experiment)                                                         | 213.33 ± 14.15                 | 6.63  | 6.08 fold Increase* |
| 2  | AD22                                                                                 | 318.00 ± 30.14                 | 9.48  | 9.07 fold Increase* |
| 3  | DNA-Apt + AD22                                                                       | 366.00 ± 71.39                 | 19.51 |                     |
| 4  | DNA-Apt + APC                                                                        | 329.50 ± 48.37                 | 14.68 |                     |
| 5  | AD22 + APC                                                                           | 276.75 ± 89.41                 | 32.31 |                     |
| 6  | DNA-Apt + AD22 + APC                                                                 | 287.50 ± 17.31                 | 6.02  |                     |
|    | % change in Rct values from the 1st experimental group to the 4th experimental group |                                |       | 54.45 % Increase    |
|    | % change in Rct values from the 2nd experimental group to the 5th experimental group |                                |       | 12.97 % decrease    |
|    | % change in Rct values from the 3rd experimental group to the 6th experimental group |                                |       | 21.44 % decrease    |
|    | % change in Rct values from the 4th experimental group to the 6th experimental group |                                |       | 12.75 % decrease    |
| *  | APC (control experiment)                                                             | 248.25 ± 21.17<br>RSD %=8.53 % |       | 7.08 fold Increase* |

\* The average Rct value measured after only DNA-Apt or AD22 or APC immobilization onto the CNF-IL/PGE surface, respectively; 6.08, 9.07 and 7.08 fold increase was observed.

**Table S8.** The average Rct value (n=3) measured before/after interaction of 0.1 µg/mL DNA-Apt with 0.6 µg/mL APC, PC, THR, BSA in serum medium diluted 1:2000 FBS:PBS.

| Experimental group | Average Rct value (Ohm) | RSD % | Change              |
|--------------------|-------------------------|-------|---------------------|
| DNA-Apt            | 238 ± 6.24              | 2.62  | 8.99 fold Increase* |
| APC                | 235.33 ± 19.60          | 8.33  | 8.89 fold Increase* |
| PC                 | 241.60 ± 61.52          | 25.46 | 9.12 fold Increase* |
| THR                | 218.20 ± 57.95          | 26.56 | 8.24 fold Increase* |
| BSA                | 196.25 ± 37.40          | 19.06 | 7.41 fold Increase* |
| DNA-Apt + APC      | 332.50 ± 14.27          | 4.29  | 39.70 % Increase    |
| DNA-Apt + PC       | 257.33 ± 29.54          | 11.48 | 8.12 % Increase     |
| DNA-Apt + THR      | 202.00 ± 33.60          | 16.63 | 15.12 % decrease    |
| DNA-Apt + BSA      | 157 ± 9.19              | 5.84  | 33.82 % decrease    |

\* The average Rct value measured after only DNA-Apt or APC or other proteins (PC, THR, BSA) immobilization onto the CNF-IL/PGE surface, respectively; 8.99, 8.89, 9.12, 26.56 and 19.06 fold increases were observed.

**Table S9.** The average Rct values (n=3) measured before and after interaction of 0.1 µg/mL DNA-Apt with 0.6 µg/mL APC in the presence of 0.1 µg/mL AD22 in artificial serum medium.

| No | Experimental group                                                                   | Average Rct value (Ohm)         | RSD % | Change               |
|----|--------------------------------------------------------------------------------------|---------------------------------|-------|----------------------|
| 1  | DNA-Apt (control experiment)                                                         | 225.50 ± 21.76                  | 9.65  | 9.5 fold Increase*   |
| 2  | AD22                                                                                 | 262.75 ± 33.36                  | 12.7  | 11.16 fold Increase* |
| 3  | DNA-Apt + AD22                                                                       | 379.75 ± 42.84                  | 11.28 |                      |
| 4  | DNA-Apt + APC                                                                        | 385.25 ± 46.02                  | 11.94 |                      |
| 5  | AD22 + APC                                                                           | 226.50 ± 39.79                  | 17.57 |                      |
| 6  | DNA-Apt + AD22 + APC                                                                 | 295.75 ± 18.41                  | 6.24  |                      |
|    | % change in Rct values from the 1st experimental group to the 4th experimental group |                                 |       | 70.84 % Increase     |
|    | % change in Rct values from the 2nd experimental group to the 5th experimental group |                                 |       | 13.79 % decrease     |
|    | % change in Rct values from the 3rd experimental group to the 6th experimental group |                                 |       | 22.25 % decrease     |
|    | % change in Rct values from the 4th experimental group to the 6th experimental group |                                 |       | 23.36 % decrease     |
| *  | APC (control experiment)                                                             | 259.75 ± 74.71<br>RSD %=28.76 % |       | 11.03 fold Increase* |

\* The average Rct value measured after only DNA-Apt or AD22 or APC immobilization to the CNF-IL/PGE surface, respectively; 9.05, 11.16 and 11.03 fold increase was observed.
